# Supplementary material
Source: PubMed Central journal article supplement (PMC7252505)
Supplement: NIHMS1586756-supplement-Supplement1.pdf [file NIHMS1586756-supplement-Supplement1.pdf]

Supplement of Atmos. Chem. Phys., 20, 4313–4332, 2020  
<https://doi.org/10.5194/acp-20-4313-2020-supplement>  
© Author(s) 2020. This work is distributed under  
the Creative Commons Attribution 4.0 License.

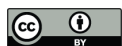

Atmospheric  
Chemistry  
and Physics  
Open Access  
EGU

*Supplement of*

**Simulation of organic aerosol formation during the CalNex study:  
updated mobile emissions and secondary organic aerosol  
parameterization for intermediate-volatility organic compounds**

**Quanyang Lu et al.**

*Correspondence to:* Allen Robinson (alr@andrew.cmu.edu) and Benjamin Murphy (murphy.benjamin@epa.gov)

The copyright of individual parts of the supplement might differ from the CC BY 4.0 License.

## 1 Parameter fitting for SOA formation from lumped IVOC species

The loss term is defined as squared error between two surfaces:  $m_{SOA,simp}(OA, t)$  and  $m_{SOA,79}(OA, t)$ :

$$Loss = \sum_{OA=1}^{10} \sum_{t=1}^{48} (m_{SOA,simp}(OA, t) - m_{SOA,79}(OA, t))^2 \quad (1)$$

which minimizes the squared distances between two surfaces in (OA concentration, time) space. Due to very high non-linearity in Eq. (1), the optimization is decoupled into step 1: ‘ $k_{OH}$  fitting’ and step 2: ‘SOA yield fitting’.

Step 1: Relax the constrain on SOA yield to fit  $k_{OH}$ , Eq. (2) can be rewritten as,

$$m_{SOA,simp}(t) = \sum_j m_j \gamma_j f(k_{OH,j}, t) = \sum_j m_j \gamma_j (1 - e^{-k_{OH,j}[OH]\Delta t}) \quad (2)$$

where  $\gamma_j$  is the free variable representing SOA yield of surrogate j at given OA concentration, [OH] is assuming to be  $3 \times 10^6 \text{ cm}^{-3}$ . Solving Eq. (2) with 2 unknowns:  $k_{OH,j}$  and  $\gamma_j$ ,  $k_{OH,j}$  is the fitted OH reaction rate for the new lumped IVOC group.

Step 2: After solving for  $k_{OH,j}$ , we now eliminate the non-linearity in the time term of Eq. (2) by replacing unknown  $f(k_{OH,j}, t)$  with calculated reacted fraction  $r_{j,t} = 1 - e^{-k_{OH,j}[OH]\Delta t}$  from fitted  $k_{OH,j}$ . Therefore, we can minimize the loss in Eq. (1) for each reduced IVOC groups,

$$Loss = \sum_{OA=1}^{10} \sum_{t=1}^{48} (\sum_{i \in j} m_{SOA,i}(OA, t) - \sum_{i \in j} m_{IVOC,i} [\alpha_{j,1} \xi_{OA,C^*=0.1} + \alpha_{j,2} \xi_{OA,C^*=1} + \alpha_{j,3} \xi_{OA,C^*=10} + \alpha_{j,4} \xi_{OA,C^*=100}] r_{j,t})^2 \quad (3)$$

where  $\alpha_{j,1}$  to  $\alpha_{j,4}$  are the fitted SOA parameterization for reduced IVOC group j. Minimization of the loss between  $m_{SOA,simp,j}(OA, t)$  to  $\sum_{i \in j} m_{SOA,i}(OA, t)$  is performed with the surface fitting toolbox in MATLAB.

## 2 Equations

$$r = \frac{\text{Cov}(OA_{measured}, OA_{model})}{\text{Var}(OA_{measured}) \text{Var}(OA_{model})} \quad (S1)$$

$$RMSE = \sqrt{\frac{\sum_{i=1}^N (OA_{measured} - OA_{model})^2}{N}} \quad (S2)$$

,where OA is the series of hourly-average value from measurements and model, and S1 and S2 are taking the statistics over hourly values.

$$\text{Fractional bias} = \frac{1}{N} \sum_{i=1}^N \frac{P-M}{\frac{P+M}{2}} \quad (S3)$$

$$\text{Fractional error} = \frac{1}{N} \sum_{i=1}^N \frac{|P-M|}{\frac{P+M}{2}} \quad (S4)$$

,where P is the predicted value, M is the measured value, and N is the sample size.

3 Figs. S1 to S7

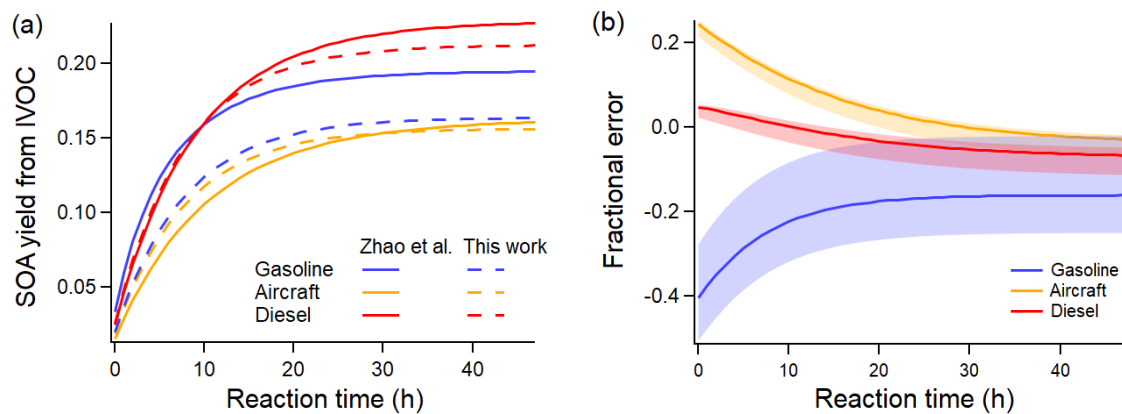

Figure S1: (a) Comparison of predicted SOA formation per unit mass mobile IVOC emission using original and four-lumped-species parameterizations at  $OA = 5 \mu\text{g m}^{-3}$ , average  $[OH] = 3 \times 10^6 \text{ cm}^{-3}$  (b) Relative error in SOA formed between original and four-lumped-species parameterizations (Solid line is the relative error at  $OA = 5 \mu\text{g m}^{-3}$ , shaded area corresponds to  $OA = 1$  to  $50 \mu\text{g m}^{-3}$ )

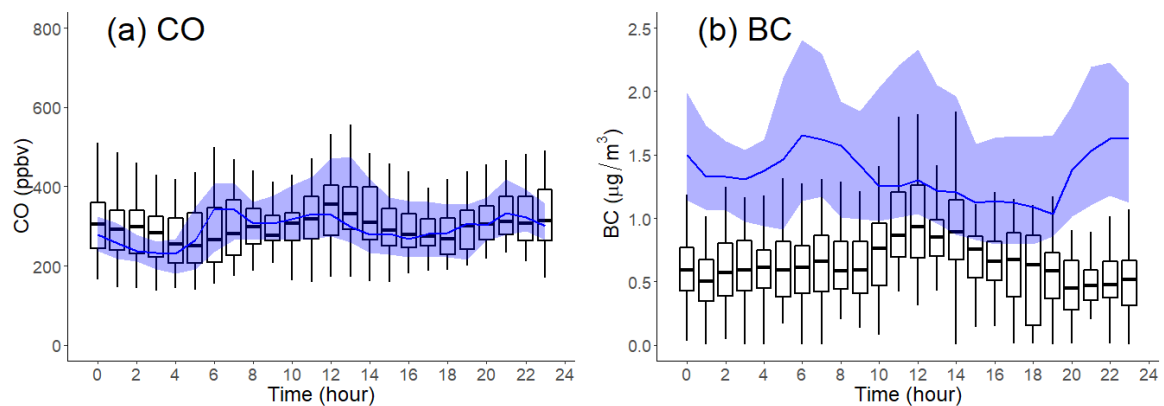

**Figure S2: Comparison of measured (boxplot, solid box denotes 25<sup>th</sup> to 75<sup>th</sup> percentiles and whiskers denote 10<sup>th</sup> to 90<sup>th</sup> percentiles) and modelled (line, shaded area denotes 25<sup>th</sup> to 75<sup>th</sup> percentiles) diurnal patterns in Pasadena, CA during CalNex for species: (a) CO (b) BC**

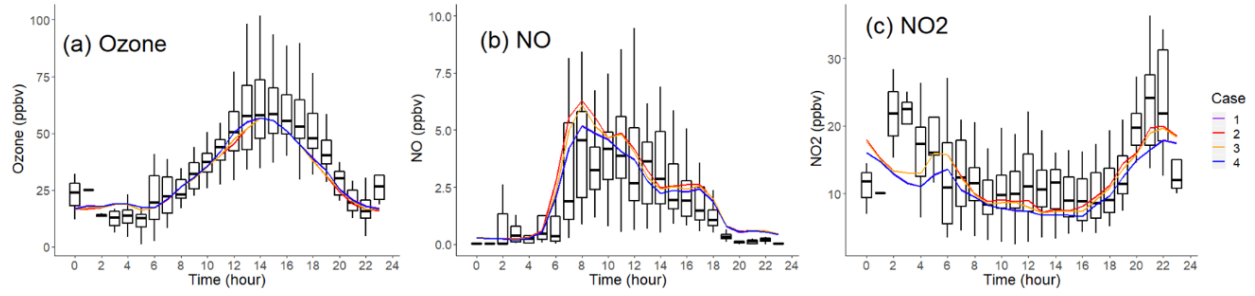

**Figure S3: Comparison of measured (boxplot, solid box denotes 25<sup>th</sup> to 75<sup>th</sup> percentiles and whiskers denote 10<sup>th</sup> to 90<sup>th</sup> percentiles) and modelled (line, from Case 1 to Case 4) diurnal patterns in Pasadena, CA during CalNex for species: (a) Ozone (b) NO and (c) NO<sub>2</sub>**

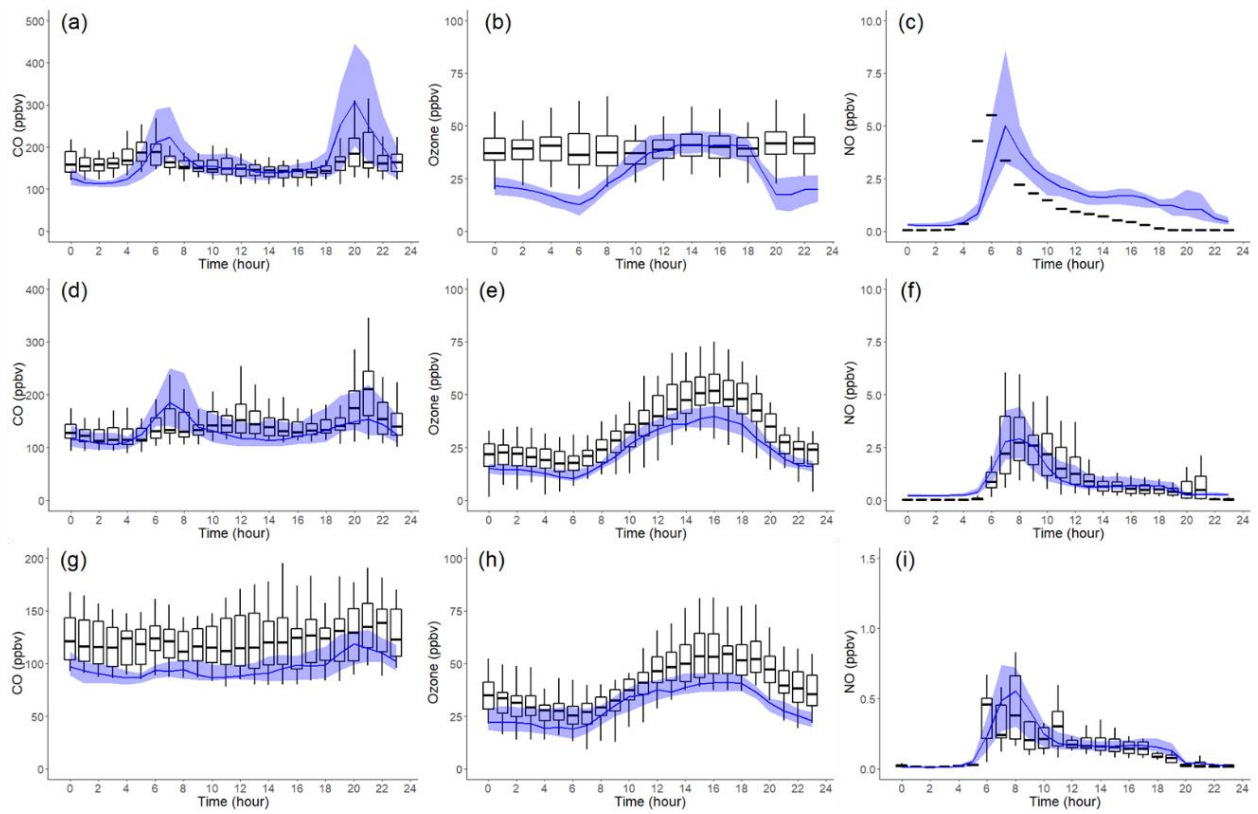

**Figure S4: Comparison of measured (boxplot, solid box denotes 25<sup>th</sup> to 75<sup>th</sup> percentiles and whiskers denote 10<sup>th</sup> to 90<sup>th</sup> percentiles) and modelled (line, shaded area denotes 25<sup>th</sup> to 75<sup>th</sup> percentiles) diurnal patterns during CalNex and CARES for species: CO, O<sub>3</sub> and NO in (a-c) Bakersfield, (d-f) Sacramento and (g-i) Cool**

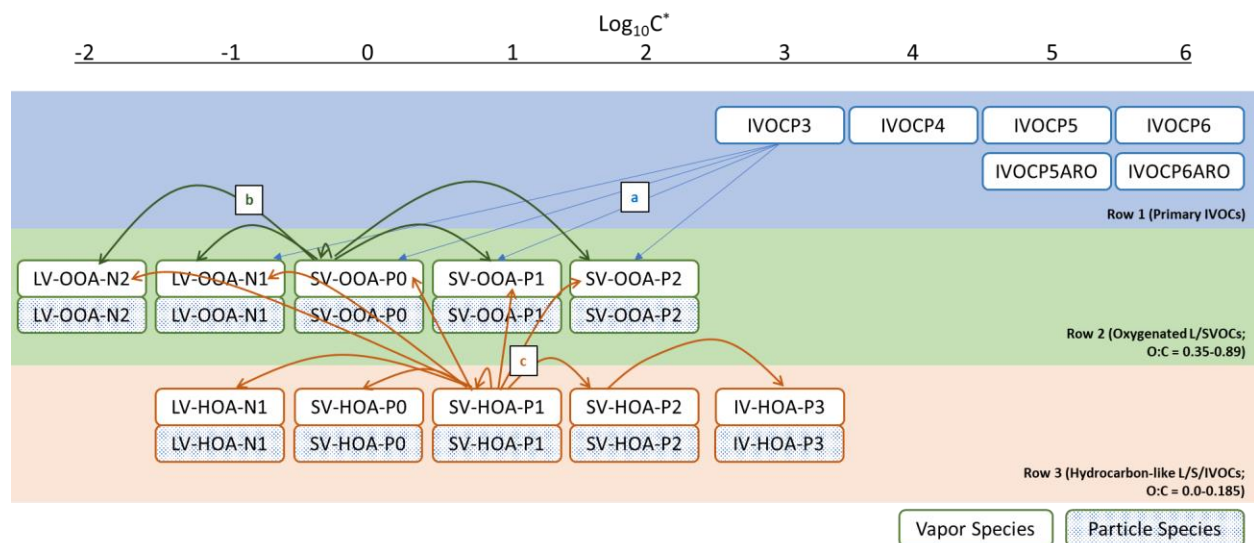

**Figure S5. Schematic of stoichiometry for OH oxidation first-generation and multigenerational aging. Species are segregated into primary IVOC species (row 1, blue), substantially oxygenated LVOC and SVOC species (row 2, green) and hydrocarbon-like or mildly oxygenated species (row 3, orange). Species in row 2 are closely aligned with SOA while species in row 3 are aligned with POA. Particle species are in equilibrium with associated vapor-phase species. Oxidation only occurs in the gas-phase. a) First-generation oxidation of primary IVOCs. All six species in Row 1 form products across the four OOA species in row 2 from LV-OOA-N1 to SV-OOA-P2. b) Multigenerational oxidation of oxygenated LVOCs and SVOCs. These reactions do not produce hydrocarbon-like species. Oxidation of all five vapor-phase species in Row 2 can produce mass in all five bins; thus functionalization and fragmentation pathways are represented. c) Multigenerational oxidation of hydrocarbon-like LVOCs, SVOCs, and IVOCs. These reactions may produce oxygenated or hydrocarbon-like species. Oxidation of all five vapor-phase species in Row 3 may produce mass in all ten vapor-phase species in Rows 2 and 3; thus functionalization and fragmentation are possible. Oxidation of species in row 2 is more likely to lead to fragmentation than is oxidation of species in row 3. Gas and particle emissions are applied to species in Rows 1 and 3.**

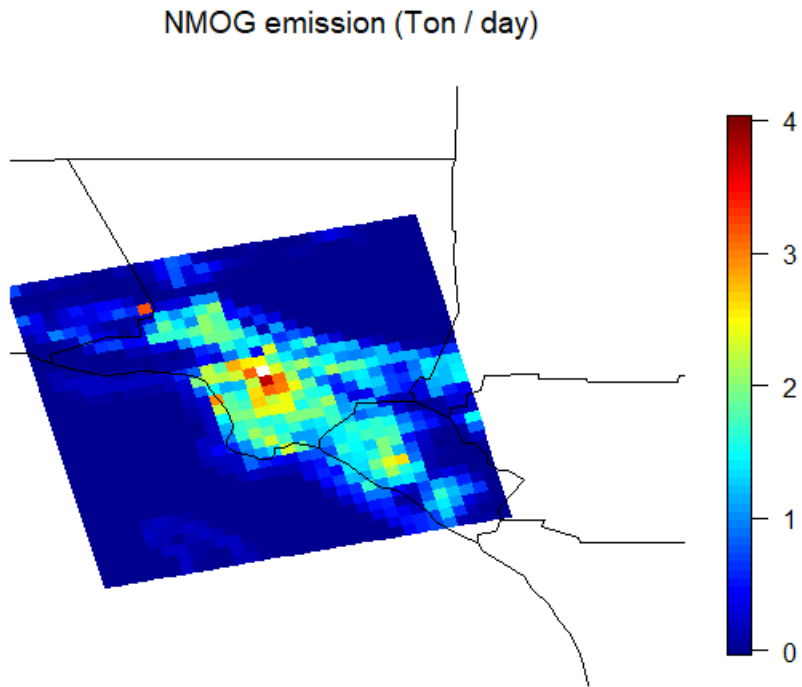

Figure S6: (a) Los Angeles region in this study as defined by simulation grid cells ( $30 \times 30$  grid cell with 4 km resolution, equivalent to  $120 \text{ km} \times 120 \text{ km}$ )



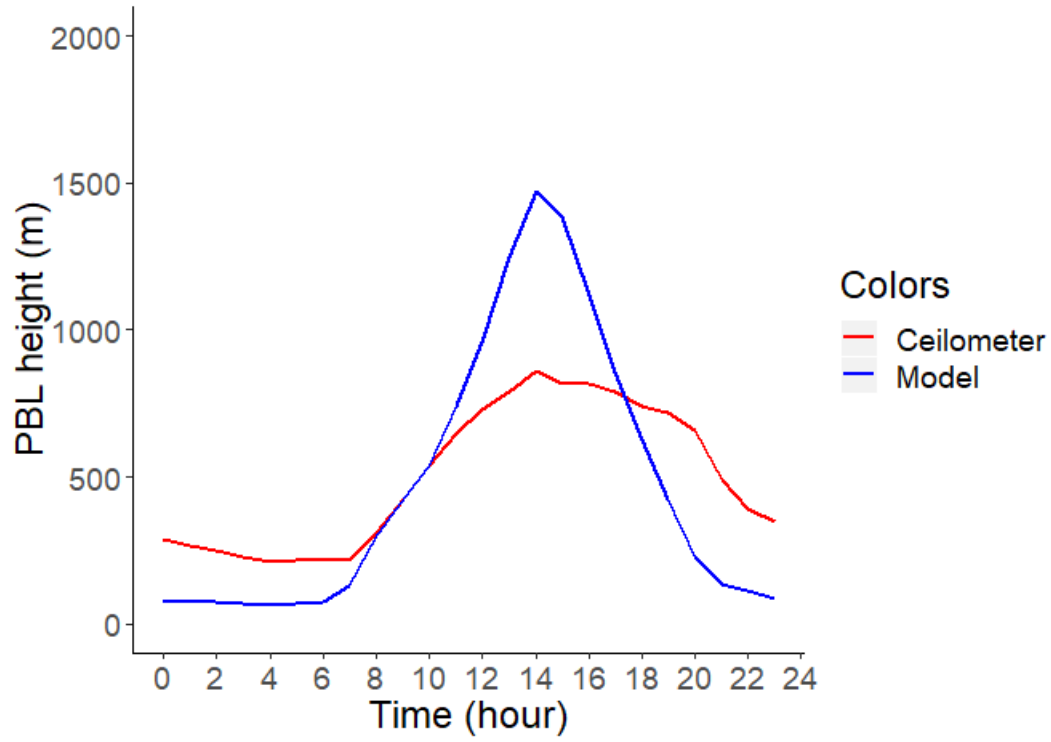

Figure S7: Comparison of ceilometer measured (h1) and modelled PBL height diurnal patterns at Pasadena during CalNex (line denotes median value)

### 3 Table S1

**Table S1 Nomenclature of species in Figure S5 and CMAQ v5.3**

| Species Name in Figure S5 | Species Name in CMAQv5.3<br>(Gas/Particle) |
|---------------------------|--------------------------------------------|
| LV-OOA-N2                 | VLVOO1/ALVOO1                              |
| LV-OOA-N1                 | VLVOO2/ALVOO2                              |
| SV-OOA-P0                 | VSVOO1/ASVOO1                              |
| SV-OOA-P1                 | VSVOO2/ASVOO2                              |
| SV-OOA-P2                 | VSVOO3/ASVOO3                              |
| LV-HOA-N1                 | VLVPO1/ALVPO1                              |
| SV-HOA-P0                 | VSVPO1/ASVPO1                              |
| SV-HOA-P1                 | VSVPO2/ASVPO2                              |
| SV-HOA-P2                 | VSVPO3/ASVPO3                              |
| SV-HOA-P3                 | VIVPO1/AIVPO1                              |
